# Supplementary material
Source: PubMed Central journal article supplement (PMC2939660)
Supplement: supp_110.168815_JPET168815_Supplement_figures.pdf [file supp_110.168815_JPET168815_Supplement_figures.pdf]

**Online Supplement**

**Role of Sphingolipid Mediator Ceramide in Obesity and Renal Injury in  
Mice Fed a High Fat Diet**

Krishna M. Boini, Chun Zhang, Min Xia, Justin L. Poklis, Pin-Lan Li

Department of Pharmacology and Toxicology, Medical College of Virginia Campus,  
Virginia Commonwealth University, Richmond, VA, 23298, USA

**Journal Title:** The Journal of Pharmacology and Experimental Therapeutics

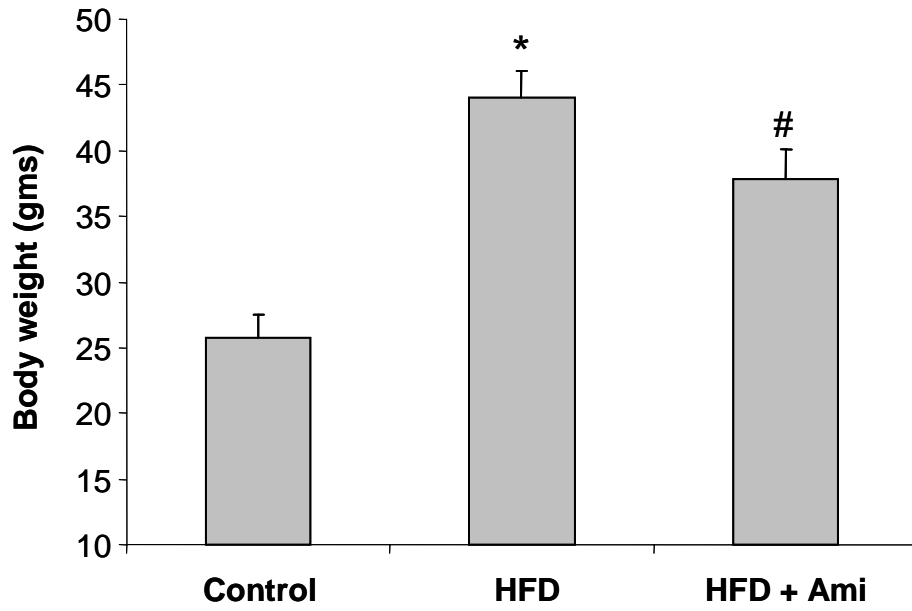

**Supplemental Figure 1. Effect of amitriptyline treatment on the high fat diet induced obesity in C57BL/6J mice.**

Values are means  $\pm$  SE (n=4) of body weight in control or HFD fed C57BL/6J mice with or without amitriptyline (Ami) treatment. \* Significant difference ( $P < 0.05$ ) compared to the values from mice receiving the control diet, # Significant difference ( $P < 0.05$ ) compared to the values from mice receiving the HFD.

A)

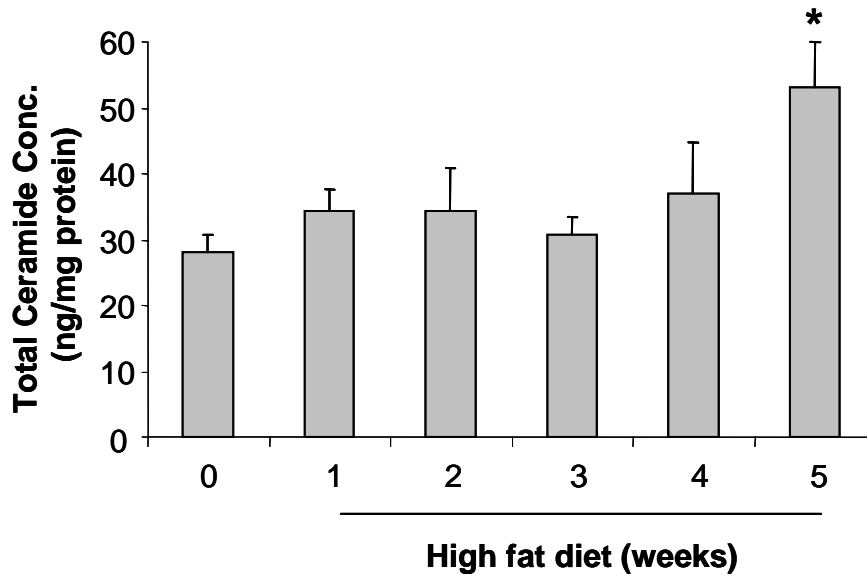

B)

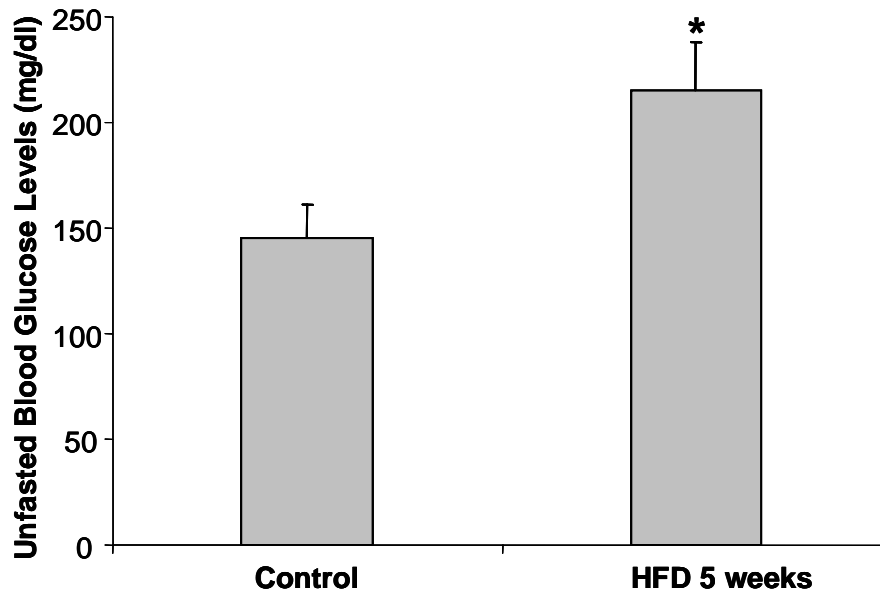

**Supplemental Figure 2. Plasma total ceramide concentrations and blood glucose levels in C57BL/6J mice on high fat diet treatment.**

Data are arithmetic means  $\pm$  SE (n= 4 each group) of the time course of plasma total ceramide concentrations (A), unfasted blood glucose levels (B) in control or HFD fed C57BL/6J mice. \* Significant difference ( $P<0.05$ ) compared to the control mice.
